# Supplementary material for: Evolving pathologic concepts of serrated lesions of the colorectum
Source: PubMed Central journal article supplement — J Pathol Transl Med. 2020 Jun 26;54(4):276–89. doi: 10.4132/jptm.2020.04.15 (PMC7385269; doi:10.4132/jptm.2020.04.15), 2020-06-26
Supplement: jptm-2020-04-15-suppl.pdf [file jptm-2020-04-15-suppl.pdf]

**Supplementary Table S1. Frequencies of *BRAF/KRAS* mutations in colorectal sessile serrated lesions (SSLs): a review of the literature**

| Reference <sup>a</sup>                  | Country       | <i>BRAF</i> -mutant SSLs/tested SSLs (%) | <i>KRAS</i> -mutant SSLs/tested SSLs (%) |
|-----------------------------------------|---------------|------------------------------------------|------------------------------------------|
| Jass et al. 2006[33]                    | Canada        | 26/32 (81%)                              | 1/31 (3%)                                |
| Chung et al. 2008[34]                   | United States | 6/6 (100%)                               | 0/6 (0%)                                 |
| Kim et al. 2008[35]                     | United States | 26/32 (81%)                              | 2/32 (6%)                                |
| Caruso et al. 2009[36]                  | Australia     | 21/23 (91%)                              | 1/23 (4%)                                |
| Sandmeier et al. 2009[37]               | Switzerland   | 10/16 (63%)                              | 4/16 (25%)                               |
| Yachida et al. 2009[38] <sup>b</sup>    | United States | 21/21 (100%)                             | 0/22 (0%)                                |
| Fujita et al. 2011[42]                  | Japan         | 14/23 (61%)                              | 1/23 (4%)                                |
| Kim et al. 2011[43]                     | South Korea   | 34/56 (61%)                              | 7/56 (13%)                               |
| Maeda et al. 2011[44]                   | Japan         | 22/30 (73%)                              | 2/30 (7%)                                |
| Kwon et al. 2014[45]                    | South Korea   | 14/21 (67%)                              | 2/26 (8%)                                |
| Mesteri et al. 2014[39] <sup>c</sup>    | Austria       | 42/42 (100%)                             | 0/4 (0%)                                 |
| Morimoto et al. 2014[46]                | Japan         | 22/32 (71%)                              | 0/32 (0%)                                |
| Naito et al. 2014[47] <sup>d</sup>      | Japan         | 112/130 (86%)                            | 3/130 (2%)                               |
| Qiu et al. 2014[48]                     | China         | 3/21 (14%)                               | 1/21 (5%)                                |
| Rau et al. 2014[40]                     | Germany       | 41/51 (80%)                              | 4/51 (8%)                                |
| Lee et al. 2015[49]                     | South Korea   | 6/32 (19%)                               | 1/32 (3%)                                |
| Murakami et al. 2015[50] <sup>e</sup>   | Japan         | 35/50 (70%)                              | 0/50 (0%)                                |
| Nosho et al. 2015[51]                   | Japan         | 112/132 (85%)                            | 4/132 (3%)                               |
| Rau et al. 2016[41] <sup>f</sup>        | Germany       | 176/220 (80%)                            | 7/220 (3%)                               |
| Bettington et al. 2017[24] <sup>g</sup> | Australia     | 127/137 (93%)                            | 1/137 (1%)                               |
| Tanaka et al. 2017[52]                  | Japan         | 102/123 (83%)                            | 7/123 (6%)                               |
| Hashimoto et al. 2017[53] <sup>h</sup>  | Japan         | 78/91 (86%)                              | 6/91 (7%)                                |
| Liu et al. 2018[22]                     | Australia     | 436/448 (97%)                            | 2/446 (0.5%)                             |
| Cho et al. 2018[54]                     | Japan         | 223/272 (82%)                            | 28/272 (10%)                             |
| Chan et al. 2020[55]                    | China         | 21/35 (60%)                              | 3/35 (9%)                                |

<sup>a</sup>Reference numbers in this table are accord with those in the main article.

<sup>b</sup>In this study, total 22 (21) cases consisted of 9 (9) SSLs and 13 (12) SSLDs.

<sup>c</sup>In this study, *BRAF* mutation was tested by VE1 immunohistochemistry.

<sup>d</sup>In this study, total 130 cases consisted of 120 SSLs and 10 SSLDs.

<sup>e</sup>In this study, total 50 cases consisted of 27 SSLs, 14 SSLs with high-grade dysplasia, and 9 SSLs with submucosal carcinoma.

<sup>f</sup>In this study, total 220 cases consisted of 179 SSLs and 41 SSLDs.

<sup>g</sup>In this study, all the 137 cases were SSLD or SSL with carcinoma.

<sup>h</sup>In this study, total 91 cases consisted of 45 SSLs and 46 SSLDs.
